# Supplementary material for: IL-18BP Improves Early Graft Function and Survival in Lewis–Brown Norway Rat Orthotopic Liver Transplantation Model
Source: MDPI journal article supplement (doi:10.3390/biom12121801), 2022-12-01
Supplement: s1 [file s1]

It is well known that inflammation as a complex interaction between some soluble cytokines and cells participates in the process of immunological rejection. The metabolic pathway of cyclooxygenase (COX) plays a prominent role in this process. The COX-catalyzed conversion of AA to prostaglandins (PGS) and other inflammatory mediators encourage the inflammatory response. In pathological situations, the continued production of COX-2 triggers the release of downstream inflammatory factors and facilitates the aggravation of inflammation.

Therefore, we conducted qRT-PCR and western blotting to detect the expression of COX-2 mRNA and protein. Compared with sham group, the content of COX-2 mRNA and protein remarkably increased after OLTx of AAV8-Luc group; However, compared with the AAV8-Luc group, intervening with AAV8-II18bp reduced the expression of COX-2 (Figure S1A,B).

We also performed ELISA assay to detect the expression levels of PGE2 (the downstream product of COX-2) in serum. As shown in Figure S1C, compared with the sham group, the content of PGE2 in AAV8-Luc group was significantly increased. Conversely, in AAV8-II18bp group, the level of PGE2 was down-regulated.

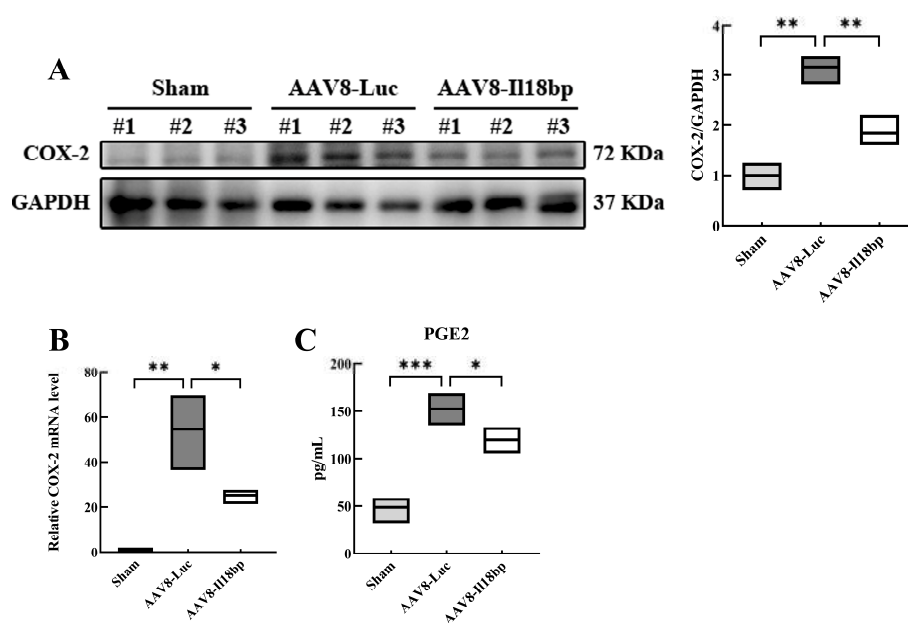

**Figure S1.** The emergence of DNA fragments was detected through agarose gel electrophoresis.

\*  $p < 0.05$ ; \*\*  $p < 0.01$ ; \*\*\*  $p < 0.001$ .
